# Molecular Mechanism of Substrate Transport and Dynamics of the Cyanobacterial Bicarbonate Transporter BicA †

Matthew C. Chan,<sup>‡</sup> Yazeed Alfawaz,<sup>‡</sup> and Diwakar Shukla<sup>\*,‡,¶,§,||</sup>

<sup>‡</sup>*Department of Chemical and Biomolecular Engineering, University of Illinois  
Urbana-Champaign, Urbana, IL, 61801, United States*

<sup>¶</sup>*Center for Biophysics and Quantitative Biology, University of Illinois Urbana-Champaign,  
Urbana, IL, 61801, United States*

<sup>§</sup>*Department of Plant Biology, University of Illinois Urbana-Champaign, Urbana, IL 61801,  
United States*

<sup>||</sup>*Department of Bioengineering, University of Illinois Urbana-Champaign, Urbana, IL  
61801, United States*

E-mail: diwakar@illinois.edu

---

<sup>†</sup>Running title: Transport mechanism of BicA

## Abstract

Cyanobacteria are responsible for up to 80% of aquatic carbon dioxide fixation and have evolved specialized carbon concentrating mechanism to increase photosynthetic yield. As such, cyanobacteria are attractive targets for synthetic biology and engineering approaches to address the demands of global energy security, food production, and climate change for an increasing world's population. The bicarbonate transporter BicA is a sodium-dependent, low-affinity, high-flux bicarbonate symporter expressed in the plasma membrane of cyanobacteria. Despite extensive biochemical characterization of BicA, including the resolution of the BicA crystal structure, the dynamic understanding of the bicarbonate mechanism remains elusive. To this end, we have collected over 1 ms of all-atom molecular dynamics simulation data of the BicA dimer to elucidate the structural rearrangements involved in the substrate transport process. We further characterized the energetics of the cooperativity between BicA promoters and investigated potential mutations that are shown to decrease the free energy barrier of conformational transitions. In all, our study illuminates a detailed mechanistic understanding of the conformational dynamics of bicarbonate transporters and provide atomistic insights to engineering these transporters for enhanced photosynthetic production.

Keywords: Bicarbonate transporter, BicA, Markov state model, SLC26, Molecular dynamics simulation, CO<sub>2</sub>-capturing mechanisms

## Introduction

Marine cyanobacteria, also known as green-blue algae, is estimated to contribute at least 30-80% of the Earth's total primary production.<sup>1,2</sup> In aqueous solutions, carbon dioxide (CO<sub>2</sub>) readily interconverts between carbonic acid (H<sub>2</sub>CO<sub>3</sub>) and bicarbonate ions (HCO<sub>3</sub><sup>-</sup>). Unlike CO<sub>2</sub>, HCO<sub>3</sub><sup>-</sup> cannot freely diffuse through the plasma membrane and thus requires specialized integral membrane transporters to accumulate inorganic carbon for photosynthe-

27 sis and carbohydrate production. Three bicarbonate transporters have been identified to be  
28 ubiquitously expressed in the cyanobacteria plasma membrane: BicA, a sodium-dependent,  
29 high-flux, low-affinity bicarbonate symporter; SbtA, a sodium-dependent, high-affinity sym-  
30 porter, and BCT1, a four-subunit bicarbonate transporter belonging to the ATP-binding  
31 cassette family<sup>3,4</sup> (Figure 1A). To date, the solved structure of BicA<sup>5</sup> (Figure 1B) and most  
32 recently of SbtA<sup>6</sup> have illuminated the molecular architecture of the overall topology and  
33 substrate binding site among these critical transporters.

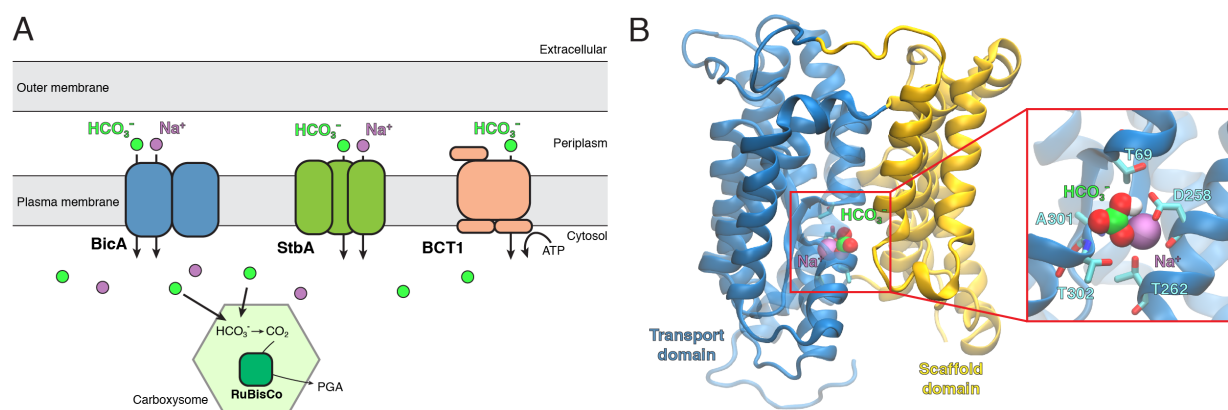

**Figure 1: Cyanobacteria bicarbonate uptake transporters.** (A) Schematic of select bicarbonate transporters expressed in the cyanobacteria plasma membrane. Transporters are depicted as follows, BicA, a sodium-dependent dimer, blue; SbtA, a sodium-dependent trimer, green; BCT1, a four-subunit ATP-binding cassette transporter. Bicarbonate anions that are transported into the cytosol are then concentrated in the carboxysome, converted to carbon dioxide via carbonic anhydrase, and finally undergo photorespiration to form phosphoglyceric acid (PGA) via RuBisCo. (B) MD equilibrated structure of the BicA based on the crystal structure PDB: 6KI1. The cytoplasmic STAS domain is not shown for clarity. The transport domain and scaffold domain are colored as blue and yellow, respectively. The bound substrates are represented as spheres. Residues that coordinate the binding of the substrates are shown as sticks.

34 In C3 crops, which include rice, barley, and wheat, carbon fixation via RuBisCo (ribulose-  
35 1,5-bisphosphate carboxylase/oxygenase) is notoriously known to be inefficient.<sup>7</sup> As such,  
36 a possible approach to increase crop yield is to incorporate the efficient CO<sub>2</sub>-capturing  
37 mechanisms utilized by cyanobacteria<sup>8</sup> into crops. Inorganic carbon transporters are one  
38 of two components that make up an effective CO<sub>2</sub>-capturing mechanism, the other being  
39 the carboxysomes, which are specialized protein micro-compartments that house RuBisCo

40 and carbonic anhydrase to concentrate CO<sub>2</sub> for efficient carbon fixation.<sup>9</sup> Kinetic modeling  
41 has proposed that introducing cyanobacteria bicarbonate transporters to the chloroplast of  
42 C3 crops may enhance photosynthetic yield by ~10%, while adding the carboxysome system  
43 may further increase yield as much as ~60%.<sup>10</sup> Incorporating either bicarbonate transporters  
44 and the carboxysome involved the synthetic addition of foreign genes to the chloroplast of  
45 plastid genome. However, whereas bicarbonate transporters are simply encoded as single  
46 genes, the *in vivo* assembly of the carboxysome requires multiple proteins and presents  
47 inherent difficulties to simultaneously introduce all the required genes. As such, bicarbonate  
48 transporters are attractive candidates for engineering terrestrial crops to enhance inorganic  
49 carbon accumulation.<sup>11,12</sup> Additionally, increased carbon availability promotes cyanobacteria  
50 growth which may be used for the production of biofuels and other bioproducts.<sup>13</sup>

51 The cyanobacteria bicarbonate transporter BicA is a member of the solute carrier 26  
52 (SLC26/SulP) family of anion transporters. Members of this family contain an N-terminal  
53 transmembrane (TM) domain comprised of 14 helices arranged in a 7+7 inverted repeat  
54 topology and a cytoplasmic C-terminal domain known as the sulfate transporter and anti-  
55 sigma factor antagonist, or STAS, domain.<sup>5</sup> Despite low sequence conservation, transporters  
56 in the SLC4 and SLC23 families share the similar 7+7 transmembrane architecture, but  
57 most notably lack the STAS domain.<sup>14</sup> Furthermore, SLC26 transporters have been shown  
58 to adopt a unique dimer interface that involves TM helices 13 and 14, whereas TM helix 6  
59 forms the dimer interface for SLC4 transporters, and TM helices 5 and 12 for SLC23.<sup>15-17</sup>  
60 Biophysical, structural, and computational studies<sup>18-20</sup> have illuminated the SLC26 fam-  
61 ily and similar related families to adopt a canonical alternating-access model in which the  
62 transporter undergoes a series of structural rearrangements to enable access of an orthosteric  
63 substrate binding site from either the extracellular or intracellular side.<sup>21</sup> More specifically,  
64 the mode of transport of SLC26 transporters has been proposed to be an elevator-like mech-  
65 anism, in which helices 1-4 and 8-11 form a mobile transport domain that translates across  
66 the membrane, thereby transporting substrates in and out of the cell (Figure 1B). TM he-

67 lices 5-7 and 12-14 form the scaffold domain that remains rigid and is primarily involved  
68 in oligomeric assembly. Analogous SLC26 transporters in humans are involved in the ex-  
69 change of anions throughout the body and mutations in these transporters are associated  
70 with various disorders such as cystic fibrous, chloride diarrhea, and chondrodysplasia.<sup>22</sup>

71 It is estimated that by 2050, the global food production must be doubled in order to  
72 sustain a growing population.<sup>23,24</sup> In order to address the concern of global food security  
73 and sustainable energy, understanding the molecular mechanism of bicarbonate transport in  
74 cyanobacteria may serve as the basis for enhancing the efficiency of crop yield and biofuel  
75 production. While the resolved structure of BicA provides invaluable structural informa-  
76 tion, the conformational dynamics and energetics involved in the substrate translocation  
77 process may not be elucidated from a single structure and therefore remain elusive. With  
78 the recent surge in the computational efficiency of graphical processing units and numerical  
79 algorithms, molecular dynamics (MD) simulations combined with Markov state modeling  
80 present a robust approach to characterize complex protein dynamics at atomistic resolu-  
81 tion.<sup>25,26</sup> Recent efforts in Markov state modeling have characterized the conformational  
82 heterogeneity of proteins of key interest to the plant biology community including phytohor-  
83 mone receptors,<sup>27-29</sup> and circadian clock photoreceptors.<sup>30-32</sup> Several membrane transporters  
84 have also been investigated using these methodologies including sugar transporters (SWEETs  
85 and SemiSWEETs),<sup>33-35</sup> bacterial nitrate transporters,<sup>36</sup> human neurotransmitter<sup>26,37</sup> and  
86 peptide transporters.<sup>38</sup> However, these transporters follow either the rocker-switch or rock-  
87 ing bundle mechanisms of alternate-access to facilitate the substrate transport.<sup>39,40</sup> BicA is  
88 distinct from these transporters because it follows the elevator-type mechanism,<sup>41-46</sup> where  
89 the transport domain undergoes a translation relative to the scaffold domain to achieve  
90 alternate-access required for substrate transport.<sup>5</sup>

91 In this current study, we employed long-timescale all-atom MD simulations to provide a  
92 fully atomistic and dynamic perspective into the bicarbonate transport mechanism of BicA.  
93 We further analyzed the simulation dataset using Markov state modeling<sup>26</sup> to quantify the

94 thermodynamics of the elevator-like mechanism and its associated structural rearrangements.  
95 Finally, we investigated the effects of BicA mutations on the transporter structure and  
96 dynamics and present a mechanistic basis for mutations that may be introduced to BicA  
97 to enhance bicarbonate transport activity. Overall, our computational study provides an  
98 atomistic level perspective into the molecular mechanisms of BicA bicarbonate transport  
99 which may be used for further engineering of cyanobacteria and plants.

## 100 **Results and discussion**

### 101 **Structural characterization of a full-length BicA dimer in a cyanobac-** 102 **teria plasma membrane**

103 We sought to simulate a full-length model of BicA in a lipid membrane that best resembles  
104 the physiological plasma membrane of cyanobacteria. In addition to portraying a realistic  
105 molecular environment, the increased membrane complexity may also affect thermodynamics  
106 barriers across the conformational landscape.<sup>35</sup> To this end, we constructed a lipid mem-  
107 brane based on previously characterized compositions determined for cyanobacteria (Figure  
108 2A).<sup>47,48</sup> Notably, the cyanobacteria plasma membrane is comprised of mainly glycolipids.  
109 The constructed membrane consisted of the four unique and most abundant identified lipids:  
110 monogalactosyl diacylglycerol (MGDG), digalactosyl diacylglycerol (DGDG), sulfoquinovo-  
111 syl diacylglycerol (SQDG), and phosphatidylglycerol (PG). The saturation of fatty acid tails  
112 were also modeled in accordance to Murata *et al.*<sup>47</sup> Further details of the composition of the  
113 simulated membrane are listed in Table 1.

114 To assess the dynamics of the cyanobacterial plasma membrane, all-atom MD simulations  
115 were performed using the AMBER18 engine<sup>49</sup> employing CHARMM36 force fields.<sup>50</sup> Three  
116 independent replicates with unique initial lipid placement were constructed and simulated  
117 for 250 ns each. The simulated membrane readily approach equilibrium after  $\sim 50$  ns, with  
118 an average membrane thickness of  $37.2 \pm 0.3$  Å and area-per-lipid of  $58.8 \pm 0.5$  Å (average

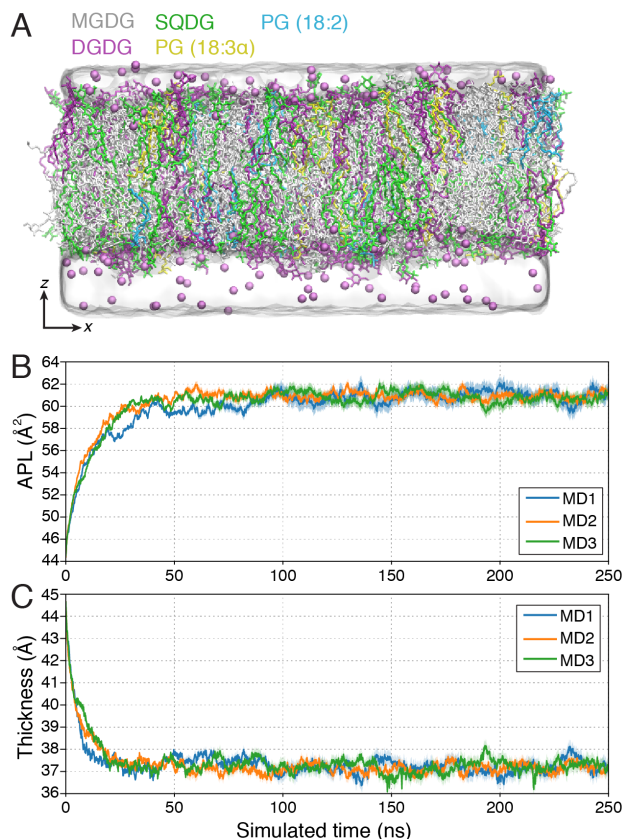

**Figure 2: Molecular dynamics simulations of the cyanobacteria plasma membrane.** (A) MD snapshot of the simulated cyanobacteria plasma membrane. Lipid molecules are shown as sticks and colored by individual lipid species. Sodium ions are represented as purple spheres. (B, C) Time-resolved measurements (B, area-per-lipid (APL) and C, membrane thickness) of the cyanobacteria lipid membrane. The three MD replicates are colored accordingly. Error bars represented accumulated standard deviation after the initial 50 ns.

**Table 1: Composition for pure cyanobacteria plasma membrane simulations**

| Lipid | Saturation (sn1/sn2) | Number of lipids per leaflet | Percentage |
|-------|----------------------|------------------------------|------------|
| MGDG  | 18:3 $\gamma$ /16:0  | 76                           | 58%        |
| DGDG  | 18:3 $\gamma$ /16:0  | 21                           | 16%        |
| SQDG  | 18:2/16:0            | 21                           | 16%        |
| PG    | 18:2/16:0            | 6                            | 5%         |
| PG    | 18:3 $\alpha$ /16:0  | 6                            | 5%         |

119  $\pm$  standard deviation, over last 50 ns) (Figure 2B, C). We find that the physical properties  
120 of our simulated membrane is in agreement with the compositionally-similar cyanobacteria  
121 thylakoid membrane, previous characterized by simulation.<sup>51</sup>

122 With the cyanobacteria plasma membrane established, we set to construct a full-length  
123 dimeric BicA system, using the resolved crystal structures of the transmembrane domain  
124 (PDB: 6KI1) and the STAS domain (PDB: 6KI2).<sup>5</sup> Based on pulsed electron-electron dou-  
125 ble resonance spectroscopy<sup>17</sup> and the cryo-EM structure of the dimeric SLC26a9 murine  
126 transporter,<sup>16</sup> the initial orientation of the two BicA promoters was placed where helices 13  
127 and 14 formed the interface. We alternatively modeled a full-length BicA dimer structure  
128 using AlphaFold<sup>52</sup> and observed a similar orientation of the transmembrane domains and  
129 its interface (Figure S1). However, the structure predicted by AlphaFold did not model the  
130 STAS domain in accordance to the crystal structure or cryo-EM density (Figure S1). As such,  
131 we proceeded with the BicA dimer structure based on the two available crystal structures  
132 and superposition of other SLC26 transporters. The full-length BicA dimer was embedded  
133 in the cyanobacteria plasma membrane and a total of seven MD replicates of 700 ns were  
134 performed (Figure 3A). During the pre-production stages of the simulations, we observed  
135 the one sodium ion to bind to one BicA monomer and remained bound throughout the 700  
136 ns simulation across the seven replicates. The binding of a sodium ion to the remaining  
137 BicA monomer was observed within 200-500 ns of simulation (Figure S2). In both cases, the  
138 sodium ion is coordinated by the side chains of Asp258, Thr262, and Thr302, consistent with  
139 the resolved crystal structure and previous mutagenesis characterization.<sup>5</sup> The bicarbonate  
140 anion was not observed to bind in the substrate cavity within the equilibration timescales.

141 The simulations reveal that the transmembrane domains of BicA remain relatively stable  
142 ( $C\alpha$  RMSD  $<$  3.5 Å), whereas the cytoplasmic STAS domain deviated from its initial struc-  
143 ture ( $C\alpha$  RMSD  $>$  3.5 Å) (Figure 3B). Moreover, upon equilibrating the full-length BicA  
144 system, we observed particularly the  $\alpha$ 2 helices to unwind and propagate the collapse of the  
145 domain. Indeed, the structural elements that form the STAS domain architecture are not



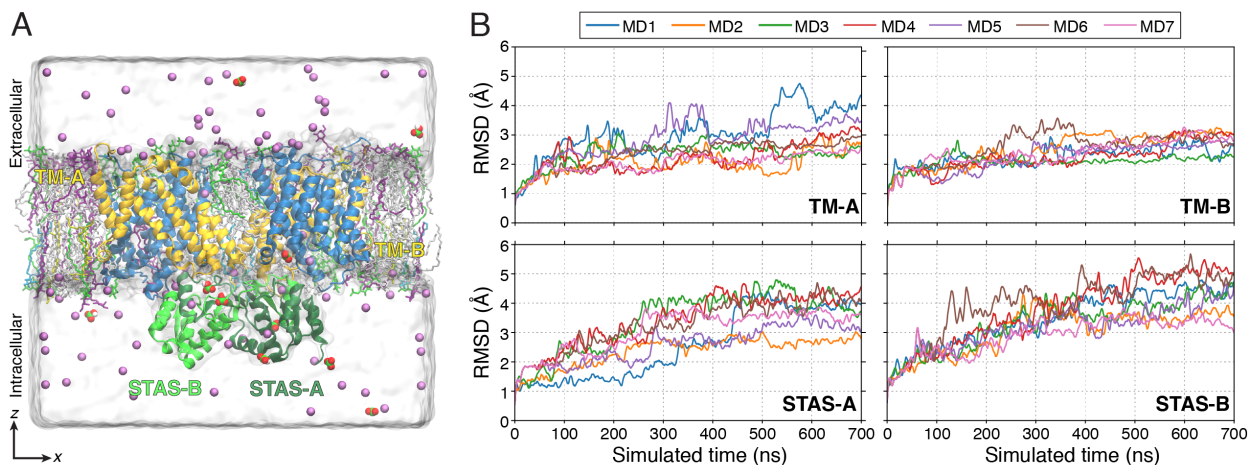

**Figure 3: Stability of the full-length BicA dimer model.** (A) MD snapshot of the full-length BicA dimer embedded in the cyanobacteria plasma membrane. Lipid molecules are shown as sticks and colored by lipid species as shown in Figure 2A. The BicA dimer is shown in cartoon representation and colored as follows: yellow: blue domain; blue: transport domain; green: STAS domain. Individual BicA protomers are labeled as A and B. Sodium ions are shown as purple spheres. Bicarbonate ions are shown as red and green spheres. (B) Time-resolved root mean squared deviations (RMSD) of individual BicA transmembrane (TM) and STAS domains across the 7 MD simulations. RMSD was calculated based on the starting structure of the 700 ns simulation. Individual MD replicates are colored accordingly.

146 maintained throughout the 700 ns long simulations (Figure S3). The inherent differences be-  
147 tween the simulated and experimentally determined structure may be attributed to artificial  
148 crystal contacts formed during crystallography or the lack of the transmembrane domains  
149 being coexpressed to mediate the folding of the STAS domain. Functionally, the STAS do-  
150 main of the sulfate transporter Sultr1;2 in *Arabidopsis thaliana* has been characterized to  
151 interact with cysteine synthase (O-acetylserine (thiol)lyase) to regulate the transporter func-  
152 tion and mediate the cellular sulfur concentration.<sup>53</sup> The association of the STAS domain  
153 with other regulatory proteins is further exhibited in SLC26A3 transporter in humans with  
154 implications to cystic fibrosis.<sup>54</sup> As such, it is likely the STAS domain may adopt various  
155 conformations in solution and be stabilized upon association. We further simulated a BicA  
156 dimer with the STAS domains removed and did not observe difference in dimer stability  
157 of the transmembrane domain (Figure S4). In all, the simulations suggest that the STAS

158 domain does not provide additional structural stability in the membrane and is concluded  
159 to be more involved in regulatory mechanisms.

## 160 **Structural requirements and energetics of BicA conformational tran-** 161 **sitions**

162 As the timescales of large structural rearrangements and substrate transport may occur on  
163 the orders of microseconds or greater,<sup>55,56</sup> observing these long timescale processes through  
164 conventional MD approaches may present inherent challenges in achieving adequate con-  
165 formational sampling. As such, to simulate the bicarbonate transport process of BicA, we  
166 implemented a Markov state model (MSM) based adaptive sampling scheme to maximize  
167 the exploration of the conformational landscape.<sup>26</sup> In brief, the adaptive sampling protocol  
168 is an iterative approach in which multiple simulations are conducted in parallel and then  
169 clustered using a K-means algorithm based on geometric criteria. To sampling the BicA  
170 substrate translocation process, the distances between substrates and binding site and the  
171  $z$ -component of the transport domain were chosen as the adaptive sampling metrics. To  
172 maximize the likelihood of exploring new conformations, structures from the least popu-  
173 lated states are seeded for the subsequent round of simulation. Furthermore, to expedite  
174 the sampling, we seeded simulations from a targeted MD trajectory in which captured the  
175 transition from inward-facing to outward-facing (Figure S5). A total of 1.003 millisecond  
176 of aggregate simulation data were collected and used to construct a MSM.<sup>57</sup> We note that  
177 the conformational sampling performed for this study simulates the export of bicarbonate  
178 to the extracellular side. Though BicA is responsible for concentrating inorganic carbon  
179 in the cell, the benefit of the Markov state modeling is representing the transport process  
180 as a reversible process and calculating the reversible transition probabilities between states,  
181 thereby capturing the bicarbonate import process.

182 By projecting the MSM-weighted simulation data on the reaction coordinates defined  
183 by the  $z$ -component of the Asp258 C $\alpha$  atom (the residue that coordinates binding of the

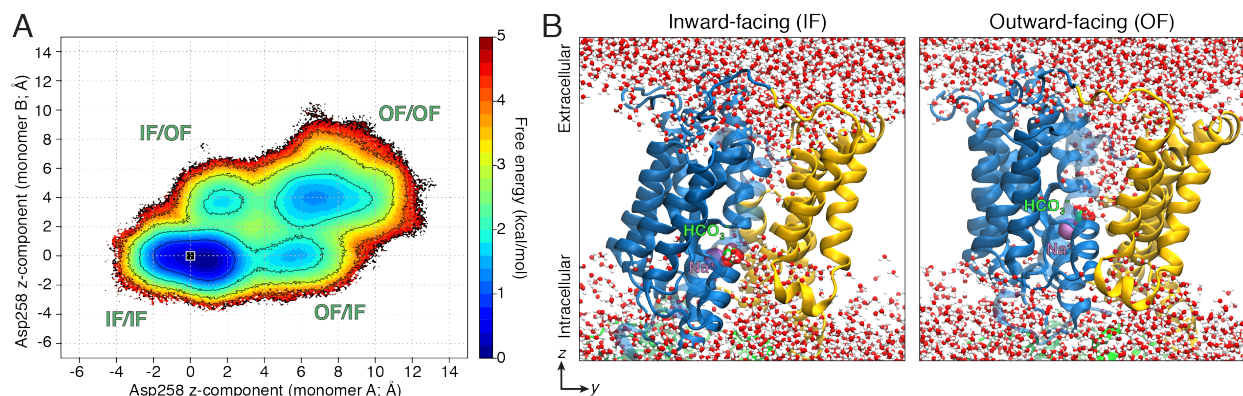

**Figure 4: Energetics of BicA conformational transitions.** (A) MSM-weighted conformational free energy landscape of BicA. The simulation data are projected on the axis defined by the  $z$ -component of the  $C\alpha$  atom of Asp258 for the respective BicA protomers. The displacement of Asp258 is measured with respect to the initial structure used for adaptive sampling simulations and indicated by the black square. Standard error measurement of the free energy landscape is presented in Figure S6. (B) Representative MD snapshots of BicA showing the solvent accessibility of the substrate binding site in the inward-facing (IF) and outward-facing (OF) conformation. The transport domain is shown as blue cartoon, while the scaffold domain is colored in yellow. Water molecules are shown as red and white spheres.

184 bicarbonate anion, Figure 1B), the conformational free energy landscape illustrates the co-  
185 operativity of the two BicA protomers (Figure 4A). Inward-facing conformations, in which  
186 the substrate binding site is accessible from the intracellular solvent (Figure 4B), are ener-  
187 getically stable with a relative free energy of 0-1 kcal/mol. Furthermore, the simulations  
188 reveal that the BicA protomer may independently undergo structural rearrangements to  
189 form outward-facing states in which the transport domain has shifted  $\sim 6\text{\AA}$  and the sub-  
190 strate binding site is now accessible to the extracellular space (Figure 4B). The free energy  
191 barrier associated with transitions from the inward-facing to outward-facing for a single  
192 BicA protomer is estimated to be  $\sim 2.5$ -3 kcal/mol (Figure 4A, S7). Based on the sampling  
193 seeded from the targeted MD trajectory, structures in which both BicA protomers form the  
194 outward-facing conformation are stable with a relative free energy minima of  $\sim 2$  kcal/mol.  
195 However, the transition free energy barriers for the remaining BicA protomer to adopt the  
196 outward-facing state, given that the other protomer is already outward-facing, is  $\sim 3$ -4 kcal/-

197 mol. Likewise, for both protomers to simultaneously transition to the outward-facing state  
198 is energetically less favored with free energy barriers of  $\sim 4$ -5 kcal/mol (Figure S7). Overall,  
199 the conformational free energy landscape suggest one protomer of BicA actively undergoes  
200 structural transitions in the dimeric state, consistent with previous studies of the SLC26Dg  
201 fumarate transporter.<sup>18</sup>

202 We note the presence of two proline residues, Pro122 and Pro341, that flank the transport  
203 domain (Figure 5A). Sequence analysis reveals that in 300 homologs, Pro341 is absolutely  
204 conserved whereas Pro122 is substituted for Ser in a few homologs (Figure 5B). As the  
205 proline residue adopts a cyclic side chain that uniquely constrains the protein backbone,  
206 we hypothesized if the steric effects provide the structural requirements for the conforma-  
207 tional transitions of BicA. To investigate the effects of the proline residues on the transport  
208 dynamics, we implemented umbrella sampling simulations and calculated the potentials of  
209 mean force (PMF) profiles of BicA to transition from inward-facing to outward-facing. The  
210 conformational free energy landscape suggest that a single BicA protomer is more favored  
211 to transition rather than both simultaneously. As such, umbrella sampling simulations were  
212 initiated from MD snapshots of the BicA monomer A obtained from the adaptive sampling  
213 simulations. Umbrella sampling simulations were conducted with the NAMD2.14 package.<sup>58</sup>

214 In the wild-type BicA system, the highest free energy barrier is associated with the  
215 transition to the outward-facing state, with a barrier of  $3.97 \pm 0.24$  kcal/mol. When the  
216 Pro122 and Pro341 are mutated to glycine residues (Pro122Gly;Pro341Gly), we observed  
217 the stability of the outward-facing state to be similar to that of the wild-type (wild-type:  
218  $3.39 \pm 0.25$  kcal/mol, Pro122Gly;Pro341Gly:  $3.66 \pm 0.24$  kcal/mol), but the free energy  
219 barrier has now increased to  $4.81 \pm 0.21$  kcal/mol (Figure 5C). Contrary to prolines, glycine  
220 residues provide innate flexibility of the peptide backbone given the lack of a heavy atom  
221 side chain. However, such flexibility did not provide necessary structural requirements to  
222 promote the formation of the outward-facing state. We further simulated and calculated  
223 the PMF profile for the respective alanine mutant (Pro112Ala;Pro341Ala) and observed

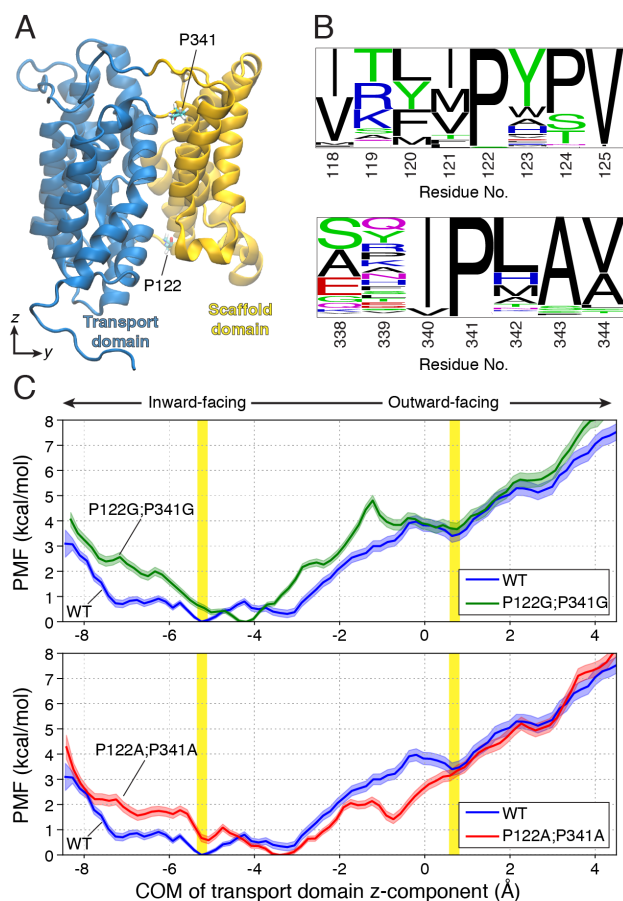

**Figure 5: Conserved prolines residues flank the BicA transport domain.** (A) Structure of the transmembrane domain of BicA, colored by transport and scaffold domain in blue and yellow respectively. Proline residues, P122 and P341, investigated are indicated and shown as sticks. (B) Sequence logo representation<sup>59</sup> of the proline and adjacent residues depicting the amino acid frequency of 300 homologs. Size of the amino acid font represents its respective frequency in the multiple sequence alignment. (C) Potentials of mean force (PMF) profiles for inward-facing to outward-facing transitions of wild-type (WT) and mutant BicA. BicA systems are colored as follows, wild-type: blue, P122G;P341G: green, P122A;P341A: red. *x*-axis represents the *z*-coordinate displacement of the center of mass (COM) of the transport domain with respect to the center of mass of the scaffold domain. Inward- and outward-facing conformations are highlight as vertical yellow bars.

224 that the free energy barrier are reduced to  $2.14 \pm 0.16$  kcal/mol (Figure 5C). Moreover,  
 225 the Pro112Ala;Pro341Ala mutant stabilizes an intermediate outward-facing state, but the  
 226 complete outward-facing state remains of similar stability (wild-type:  $3.39 \pm 0.25$  kcal/mol,  
 227 Pro122Ala;Pro341Ala:  $3.15 \pm 0.21$  kcal/mol). As alanine residues enable more structural

228 constraints on the backbone compared to the glycine residues, the PMF profiles suggest that  
229 unique dihedral constraints provided by proline residues facilitates the necessary structural  
230 rearrangements of the transport domain of BicA, although we cannot comment on how these  
231 mutants may affect transporter expression, biogenesis, folding, or stability.

## 232 **Hydrophobic interactions mediate closure of the transport domain**

233 Membrane transporters adopt a canonical series of structural rearrangements that facilitates  
234 proper substrate transport across the membrane, otherwise known as the alternating access  
235 mechanism.<sup>60</sup> As such, the substrate binding site is accessible to either the intracellular or  
236 extracellular space at a given time. Simulations of BicA reveals that the closure of the  
237 transporter from either side is facilitated by hydrophobic residues that line the substrate  
238 translocation pathway (Figure 6). Specifically, in the inward-facing conformation, closure  
239 from the extracellular side is primarily mediated by transmembrane helices 1 and 3 of the  
240 transport domain and helices 5, 7, 12, and 14 of the scaffold domain (Figure 6A). Upon  
241 substrate transport, as the transport domain shifts across the membrane, intracellular gate  
242 is formed by residues on helices 8 and 10 with the scaffold domain (Figure 6B). As per  
243 the elevator-like mechanism, the scaffold domain serves as a shared gate between intracel-  
244 lular and extracellular residues. Furthermore, residues that comprise the hydrophobic gate  
245 are generally conserved among other transporters that adopt the 7+7 transmembrane helix  
246 topology (Figure S8, S9). We expect that the hydrophobic residues in the respective posi-  
247 tions of SLC4 and SLC23 transporters to adopt a similar role in regulating the opening and  
248 closure of the transporter.

249 Given that the molecular gates of BicA are primarily facilitated by the hydrophobic  
250 interactions of aliphatic side chains, we sought to determine if mutations may be introduced  
251 to increase the substrate transport rate. Specifically, we hypothesized if substitutions to  
252 alanine residues may decrease the contacting surface area, while still retaining the nonpolar  
253 local environment to maintain proper transport function. To this end, we targeted residues

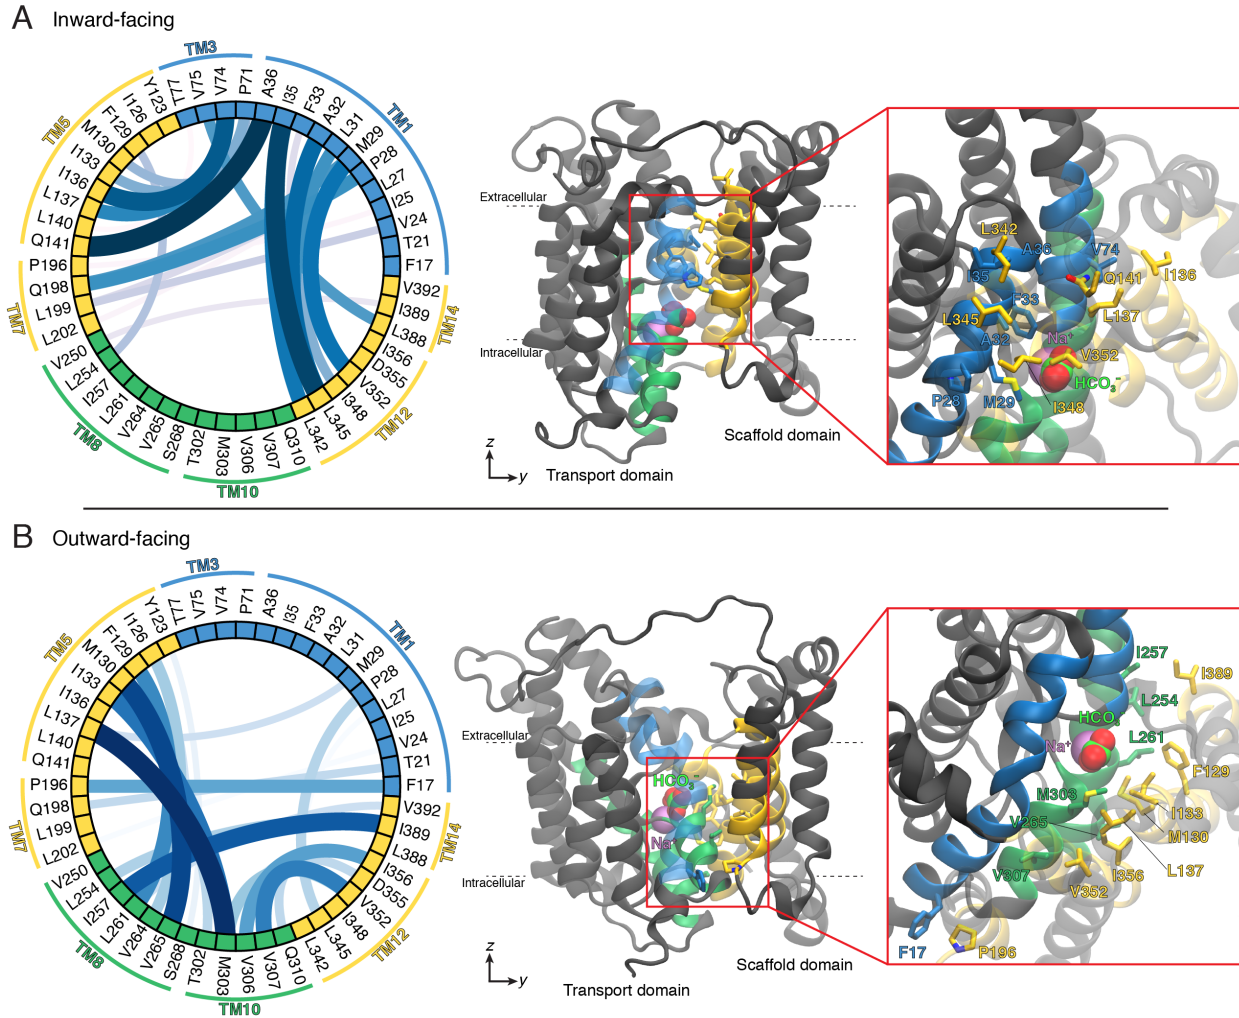

**Figure 6: Hydrophobic gating residues of BicA.** Chord diagram depicting the probability of interactions formed between gating residues in the (A) inward-facing conformation and (B) outward-facing conformation. Probability of interactions were calculated on 50,000 MD structures drawn from the respective free energy basin. Thickness and color intensity of connections between nodes represent the relative probability between two residues interacting. Accompanying MD snapshot showing selected residues mediating the closure of the transporter. Transmembrane (TM) helices are colored as follows, TM1, TM3: blue; TM5, TM7, TM12, TM14: yellow; TM8, TM10: green.

254 with large aliphatic side chains (Met, Leu, Ile, etc) located on various gating helices of BicA  
 255 and residues of high contact probability based on the MD simulations. Three BicA triple  
 256 mutants were simulated via the umbrella sampling protocol to delineate its effects on the  
 257 energetics of the transporter conformational dynamics.

258 We first characterized mutations of residues on the hydrophobic gate that re-

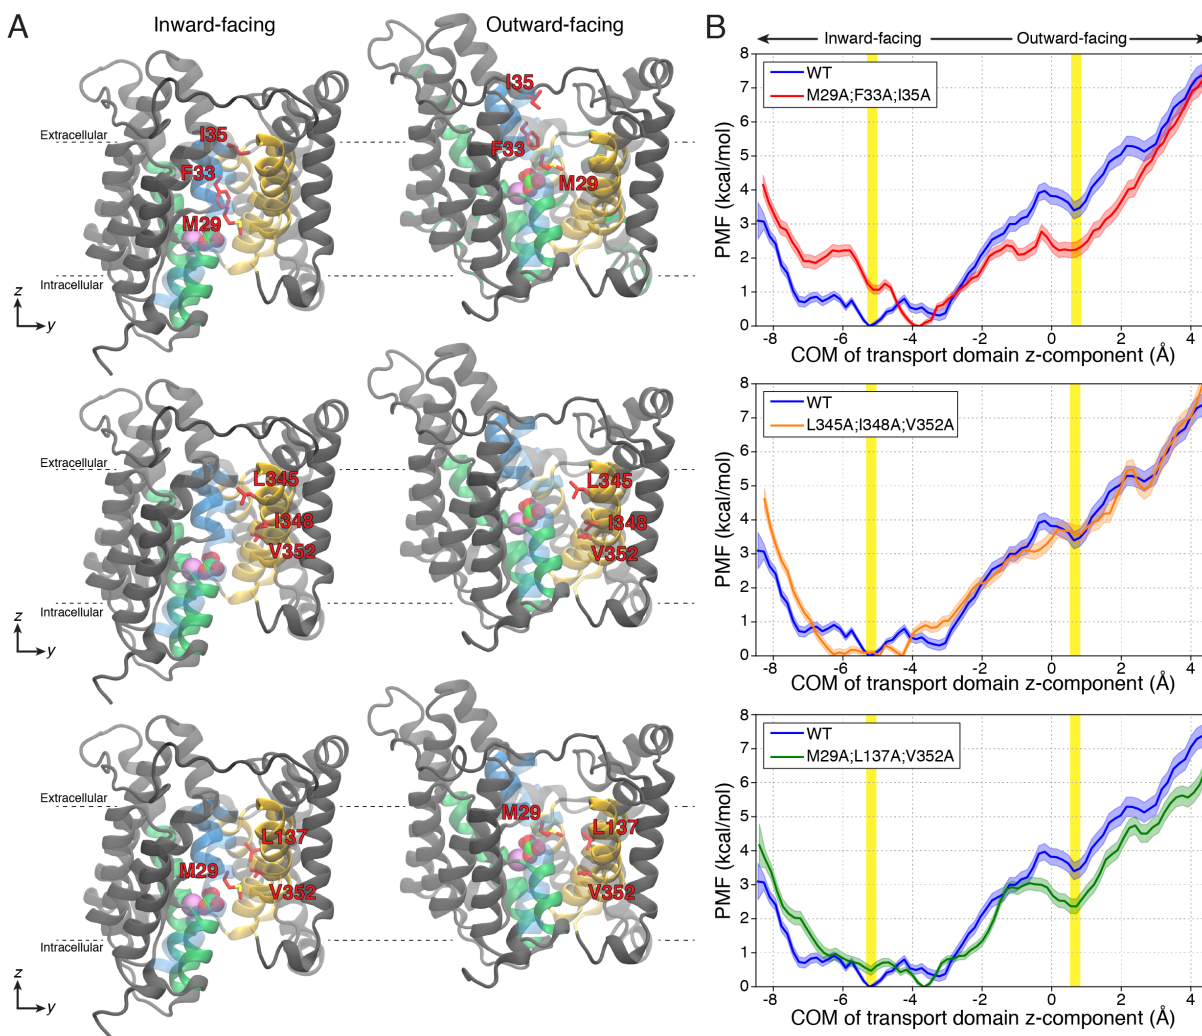

**Figure 7: Simulated BicA triple mutants.** (A) MD snapshots of the inward-facing and outward-facing conformations of BicA. Mutated residues are shown as sticks and colored red. The bicarbonate and sodium ion are shown as spheres and colored green and purple, respectively. Transmembrane (TM) helices are colored as follows, TM1, TM3: blue; TM5, TM7, TM12, TM14: yellow; TM8, TM10: green. The mutants investigated in this study are Met29Ala;Phe33Ala;Ile35Ala (top), Leu345Ala;Ile348Ala;Val352Ala (middle), and Met29Ala;Leu137Ala;Val352Ala (bottom). (B) Potential of mean force (PMF) profiles of the three studied BicA triple mutants. The wild-type BicA is shown in blue and duplicated for comparison. BicA systems are colored as follows, wild-type: blue, Met29Ala;Phe33Ala;Ile35Ala: red, Leu345Ala;Ile348Ala;Val352Ala: orange, Met29Ala;Leu137Ala;Val352Ala: green.  $x$ -axis represents the  $z$ -coordinate displacement of the center of mass (COM) of the transport domain with respect to the center of mass of the scaffold domain. Inward- and outward-facing conformations are highlight as vertical yellow bars.



259 side on the transport domain. The BicA triple mutant containing the substitutions  
260 Met29Ala;Phe33Ala;Ile35Ala are located on the extracellular half of transmembrane helix  
261 1 (Figure 7, top). These residues were primarily found to interact with residues on TM12  
262 to restrict access from the extracellular space and stabilize the inward-facing conformation  
263 (Figure 6A). The PMF profile of the Met29Ala;Phe33Ala;Ile35Ala BicA mutant reveals the  
264 free energy barrier to form the outward-facing state has decreased to  $2.78 \pm 0.20$  kcal/mol,  
265 as compared to the  $3.97 \pm 0.24$  kcal/mol in wild-type BicA (Figure 7, top). Furthermore, the  
266 relative free energy barrier of outward-facing to inward-facing transitions remains similar to  
267 the wild-type (Met29Ala;Phe33Ala;Ile35Ala: 0.56 kcal/mol, wildtype: 0.58 kcal/mol) consis-  
268 tent that these residues are primarily responsible for extracellular closure and not predicted  
269 to directly affect the stability of the outward-facing conformation.

270 The residues of the second BicA triple mutant, Leu345Ala;Ile348Ala;Val352Ala, are lo-  
271 cated on transmembrane helix 12 of the scaffold domain (Figure 7, middle). The PMF pro-  
272 files for Leu345Ala;Ile348Ala;Val352Ala predicts a modest decrease in the free energy barrier  
273 (Leu345Ala;Ile348Ala;Val352Ala:  $3.72 \pm 0.24$  kcal/mol, wild-type:  $3.97 \pm 0.24$  kcal/mol),  
274 however the outward-facing state is further destabilized. We suspect as transmembrane he-  
275 lix 12 serves as a shared gating helix that facilitate both inward-facing and outward-facing  
276 conformations, contributes to a slight favorable reduction in the free energy barrier, but also  
277 compromises on the destabilized interactions that close the intracellular pathway.

278 Lastly, the BicA mutant Met29Ala;Leu137Ala,Val352Ala targets residues on both the  
279 transport and scaffold domain (Figure 7, bottom). This mutant was specifically simu-  
280 lated to remove the hydrophobic interactions involving Met29. In the inward-facing state,  
281 Met29 interacts with Val352, whereas in the outward-facing state Met29 switches its in-  
282 teraction partner to Leu137 (Figure 6). Similar to the first described BicA triple mutant  
283 (Met29Ala;Phe33Ala;Ile35Ala), the PMF profile delineates a decrease in the free energy bar-  
284 rier (Met29Ala;Leu137Ala,Val352Ala:  $3.05 \pm 0.19$  kcal/mol, wild-type:  $3.97 \pm 0.24$  kcal/-  
285 mol) and similar stability of the outward-facing state. Overall, our simulations predict

286 alanine substitutions to residues on the transmembrane domain, specifically transmembrane  
287 helix 1, decrease the free energy barriers for structural rearrangements to increase bicarbonate  
288 uptake.

## 289 Conclusions

290 Bicarbonate transporters are key membrane transporters that regulate photosynthesis pro-  
291 duction. In this study, we utilized adaptive sampling and Markov state modeling to char-  
292 acterize the structural dynamics and thermodynamics of the BicA transport mechanism.  
293 Our simulations reveal that BicA protomers are more favored to undergo conformational  
294 transitions independently rather than simultaneously, consistent with previous cross-linking  
295 studies of the SLC26Dg transporter.<sup>17</sup> In our simulations, we observed the cytoplasmic STAS  
296 domain does not remain stable in solution and undergo various structural rearrangements.  
297 We hypothesized, the stability of the STAS domain may be facilitated with other associa-  
298 tion proteins *in vivo*. Previous experimental characterization of the related *E. coli* YchM  
299 transporter has suggested the STAS domain to interact with a number of regulatory proteins  
300 with implications on transport activity.<sup>61</sup> Further studies may focus on *in vivo* regulatory  
301 mechanisms of BicA.

302 We further investigated various BicA mutants that are predicted to affect the conforma-  
303 tional energetics of the transport process. We predict that the unique steric constraints on  
304 the protein backbone provided by prolines residues located at junction of the scaffold and  
305 transport domain facilitate the proper conformational dynamics for transport. Furthermore,  
306 substitutions to bulky aliphatic residues that form the hydrophobic gate decrease the free  
307 energy barriers for inward-facing to outward-facing transitions. Specifically, alanine muta-  
308 tions located on transmembrane helix 1 are predicted to enhance transport with minimal  
309 consequences on the stability of conformations. Such mutations to the hydrophobic gat-  
310 ing residues introduced to the sodium/proton antiporter PaNhaP were also identified to in-

crease transport activity.<sup>62</sup> However, how these mutations may affect transporter expression, folding, trafficking, or biogenesis cannot be delineated from simulations. In all, the extensive simulations conducted in this study provide a comprehensive mechanistic view of BicA transport dynamics and elucidate potential engineered mutations to enhance cyanobacteria photosynthetic yield.

## Methods

### MD simulations of pure cyanobacteria plasma membrane

To characterize the structural dynamics of BicA, we first sought to model a physiological membrane environment. Based on previous experimental characterization of cyanobacteria membranes, we constructed a symmetric lipid membrane containing the monogalactosyl diacylglycerol (MGDG), digalactosyl diacylglycerol (DGDG), sulfoquinovosyl diacylglycerol (SQDG), and phosphatidylglycerol (PG). The total number of each lipid species and lipid tail saturation are detailed in Table 1. A total of 130 lipid molecules per leaflet were assembled using PACKMOL.<sup>63</sup> Water molecules and sodium ions to neutralize the system were further added. In all, the final MD membrane system contained 152 MGDG molecules, 42 DGDG molecules, 42 SQDG molecules, 24 PG molecules, 152 sodium ions, and 19,998 water molecules totaling 140,834 atoms in a rectilinear box of 140 x 101 x 105 Å<sup>3</sup>. A total of three membrane systems, randomizing the initial lipid placement, were constructed.

The MD systems were parameterized using the CHARMM36m force field. The parameters for the saturated lipids tails (18:3 $\gamma$ /16:0, 18:2/16:0, 18:3 $\alpha$ /16:0), which are not originally parameterized in CHARMM36, were derived analogous from parameters of related lipid molecules in the CHARMM36 molecule set. The *psf* topology and coordinating file were created using the VMD psfgen plugin and converted to AMBER *prmtop* topology and *rst7* coordinate files using the *chamber* module of the ParmEd package.

Simulations were performed on the AMBER18 package using the *pmemd* GPU acceler-

336 ated module. The MD system was first minimized 7,000 steps using the steepest descent  
337 method followed by 93,000 steps using the conjugate gradient method. Prior to produc-  
338 tion simulations, the system was heated to 300K in 100K increments for 1 ns each while  
339 restraining the lipid head group atoms with a force constant of 1 kcal/mol-Å<sup>2</sup>. Production  
340 simulations were performed in an NPT ensemble using Langevin dynamics with a damp-  
341 ing coefficient of 1 ps<sup>-1</sup> at 300K, 1 bar, and positional restraints removed. A Monte Carlo  
342 barostat with an update interval of 100 steps was used to maintain pressure. A 12 distance  
343 cutoff was applied to calculate nonbonded interactions. Long-range electrostatic interactions  
344 were treated with the Particle mesh Ewald method. Hydrogen bonds were constrained using  
345 the SHAKE algorithm. An integration timestep of 2 fs was used for membrane simulations.  
346 Each MD replicate was simulated for 250 ns with a trajectory frame saving rate of 100 ps.

## 347 **Modeling of the full-length BicA dimer system**

348 The three-dimensional coordinates of the resolved BicA crystal structure (PDB:6KI1, 6KI2)<sup>5</sup>  
349 were used as the starting structure for simulations. First, transmembrane helix 14 was mod-  
350 elled based on the SLC26Dg structure (PDB: 5DA0) To model the full-length BicA dimer,  
351 two transmembrane domains were aligned to the SLC26a9 murine transporter,<sup>16</sup> in which  
352 transmembrane helices 13 and 14 formed the dimeric interface.<sup>17</sup> The STAS domain was  
353 placed under the transmembrane domain and residues that linked the two domains were  
354 modelled with MODELLER.<sup>64</sup> We found that the resulting full-length BicA dimer to mod-  
355 estly fit in the cryo-EM map,<sup>5</sup> which may be attributed to its low-resolution or reconstruction  
356 in detergent which may impact the packing of membrane proteins. The modelled dimer, con-  
357 taining residues 2-547, was embedded in the cyanobacteria plasma membrane and solvated  
358 with TIP3P water molecules. 10 bicarbonate anions were randomly placed in the solvent  
359 and sodium ions were added to neutralize the system. The final BicA dimer system consisted  
360 of 2 BicA protomers, 152 MGDG molecules, 42 DGDG molecules, 42 SQDG molecules, 24  
361 PG molecules, 10 bicarbonate anions, 80 sodium ions, and 30,200 water molecules totaling

362 in 141,886 atoms in a rectilinear box of 140.0 x 101.0 x 126.0 Å<sup>3</sup>.

363 The alternative structure prediction of the BicA dimer was generated using Al-  
364 phaFold v2.2.0 in tandem with the multimer mode.<sup>52,65</sup> The AlphaFold prediction  
365 was performed using the following parameters: `--max_template_date=2022-05-01,`  
366 `model_preset=multimer, --norun_relax, --db_preset=reduced_dbs.` The output  
367 structure from AlphaFold was not used for simulations in this study.

## 368 MD simulations of full-length BicA dimer

369 The BicA dimer system was parameterized using the CHARMM36m force field and con-  
370 ducted on the AMBER18 package. Prior to production simulation, the system was mini-  
371 mized for 5,000 steps using the steepest descent method, followed by 45,000 steps using the  
372 conjugate gradient method. The BicA dimer was then subjected to 10 pre-production sim-  
373 ulations with varying atoms restrained, totaling in 150 ns. A detailed list of temperatures,  
374 restrained atoms, and simulation length for each pre-production step is presented in Table  
375 S1.

376 Production simulations were performed under the same conditions and parameters as the  
377 previous described pure membrane system, with the exception of the use of a 4 fs integration  
378 timestep and hydrogen mass repartition.<sup>66</sup> To determine the stability of the full-length BicA  
379 dimer, a total of 7 simulations were initiated from the last pre-production step and simulated  
380 for 700 ns. The resulting trajectories from these simulations yielded BicA to remain in the  
381 inward-facing state. As such, to explore the conformational space of BicA, we adaptively  
382 sampled the conformational landscape based on the distances of the substrate to the binding  
383 sites and the displacement of the transport domain.<sup>26</sup> After 14 rounds of adaptive sampling,  
384 we did not observe either BicA protomer to transition from the inward-facing state (Fig-  
385 ure S10). As such, we seeded subsequent rounds from a targeted MD trajectory in which  
386 simulated the transition from inward-facing to outward-facing (Figure S5). The targeted  
387 MD simulation was performed using NAMD2.14<sup>58</sup> using a 200 kcal/mol-Å<sup>2</sup> force constant

388 and an outward-facing/outward-facing BicA homology model based on the NBCe1 cryo-EM  
389 structure (PDB: 6CAA)<sup>67</sup> as the target structure. A total of 29 adaptive rounds, in which  
390 individual trajectories were 60 ns long, were conducted and totaled in 1.003 ms of aggregate  
391 simulation data (Table S2).

## 392 **Trajectory analysis**

393 Trajectories were processed with in-house scripts utilizing the CPPTRAJ, pytraj,<sup>68</sup> and  
394 MDTraj<sup>69</sup> packages. Simulation trajectories were visualized using Visual Molecular Dy-  
395 namics (VMD) 1.9.3.<sup>70</sup> Residue contact probabilities were calculated using the GetContacts  
396 (<https://getcontacts.github.io/>) python package.

## 397 **Markov state modeling**

398 All 1.003 ms of aggregate simulation data from adaptive sampling simulations were used  
399 to construct a Markov state model (MSM). The simulation data were featurized based on  
400 the distances of residue pairs that were identified to uniquely formed in the inward- and  
401 outward-facing states and determined using a residue-residue contact score (RRCS).<sup>71</sup> In all,  
402 192 distances were identified between the two BicA protomers (Table S3). Additionally, the  
403 *z*-components of Asp258 and the transported bicarbonate anion were included as features for  
404 the MSM, totaling in 196 cartesian features. The number of time-independent components  
405 (tICs) and number of clusters was optimized using a grid search to maximize the VAMP1  
406 score (Figure S11A). The best-scoring model was achieved with 10 tICs and 400 clusters.  
407 A lagtime of 10 ns was determined based on convergence of the implied timescales (Figure  
408 S11B).

## 409 Umbrella sampling simulations

410 To investigate the energetics of conformational transitions of BicA mutants, we employed  
411 umbrella sampling. The displacement between the  $z$ -component of the transport domain  
412 center of mass and the  $z$ -component of the scaffold domain center of mass was used as the  
413 reaction coordinate to describe the conformational transitions from inward-facing to outward-  
414 facing. Based on the conformational free energy landscape, one protomer of BicA is predicted  
415 to undergo transitions at once, and as such, we employed the umbrella sampling protocol  
416 on only BicA monomer A. Structures were drawn from the conformational landscape. A  
417 total of 26 windows from  $z$ -coordinates -8.0 to +4.5, in 0.5Å intervals were used to seed  
418 umbrella sampling simulations. Each window was simulated for 9 ns. Umbrella sampling  
419 simulations were performed using NAMD2.14<sup>58</sup> using a 2 fs integration timestep, 12Å cutoff  
420 with a 10Å switching distance, and a harmonic force constant of 15 kcal/mol-Å<sup>2</sup>. Simulation  
421 frames were saved every 10 ps. Potentials of mean force (PMFs) were calculated using the  
422 multistate Bennett acceptance ratio as implemented by the pyMBAR python package.<sup>72</sup>

## 423 Generation of multiple sequence alignments

424 Multiple sequence alignments were generated using the ConSurf web server.<sup>73</sup> The sequences  
425 of BicA, UraA (PDB:5XLS),<sup>18</sup> and NCBe1 (PDB:6CAA)<sup>67</sup> were used as input to represent  
426 SLC26, SLC23, and SLC4 families. A 95% maximal identity between sequences and a 35%  
427 minimal identity between homologs was used to create the alignment. 300 represented  
428 sequences were sampled from the list of accepted homologs. Sequence logo figures were  
429 generated using the WebLogo server.<sup>59</sup>

## 430 Data availability

431 Molecular dynamics trajectories generated in this study are not publicly deposited as it is  
432 over 4 TB in size. Datasets are available upon request and may require several business days

433 to share. Once provided, we do not enforce any limitation for how the data may be used  
434 once requested and shared.

## 435 **Acknowledgement**

436 This research was part of the Blue Waters sustained-petascale computing project, which was  
437 supported by the National Science Foundation (awards OCI-0725070 and ACI-1238993) the  
438 State of Illinois, and as of December, 2019, the National Geospatial-Intelligence Agency. Blue  
439 Waters was a joint effort of the University of Illinois Urbana-Champaign and its National  
440 Center for Supercomputing Applications.

## 441 **Author contributions**

442 M.C.C. and D.S. designed the study. D.S. supervised the study. M.C.C. and Y.A. performed  
443 simulations. M.C.C., Y.A., and D.S. analyzed data. M.C.C. wrote manuscript with input  
444 from D.S.

## 445 **Funding**

446 This work was funded by NSF MCB 18-45606 to D.S.

## 447 **Conflicts of interest**

448 The authors declare that they have no conflicts of interest with the contents of this article.



## 449 References

- 450 (1) Liu, H.; Nolla, H. A.; Campbell, L. Prochlorococcus growth rate and contribution to  
451 primary production in the equatorial and subtropical North Pacific Ocean. *Aquatic*  
452 *Microbial Ecology* **1997**, *12*, 39–47.
- 453 (2) Partensky, F.; Hess, W. R.; Vaulot, D. Prochlorococcus, a marine photosynthetic  
454 prokaryote of global significance. *Microbiology and molecular biology reviews* **1999**,  
455 *63*, 106–127.
- 456 (3) Price, G. D.; Woodger, F. J.; Badger, M. R.; Howitt, S. M.; Tucker, L. Identification  
457 of a SulP-type bicarbonate transporter in marine cyanobacteria. *Proceedings of the*  
458 *National Academy of Sciences* **2004**, *101*, 18228–18233.
- 459 (4) Price, G. D. Inorganic carbon transporters of the cyanobacterial CO<sub>2</sub> concentrating  
460 mechanism. *Photosynthesis research* **2011**, *109*, 47–57.
- 461 (5) Wang, C.; Sun, B.; Zhang, X.; Huang, X.; Zhang, M.; Guo, H.; Chen, X.; Huang, F.;  
462 Chen, T.; Mi, H.; Yu, F.; Liu, L.-N.; Zhang, P. Structural mechanism of the active  
463 bicarbonate transporter from cyanobacteria. *Nature Plants* **2019**, *5*, 1184–1193.
- 464 (6) Liu, X.-Y.; Hou, W.-T.; Wang, L.; Li, B.; Chen, Y.; Chen, Y.; Jiang, Y.-L.; Zhou, C.-  
465 Z. Structures of cyanobacterial bicarbonate transporter SbtA and its complex with  
466 PII-like SbtB. *Cell Discovery* **2021**, *7*, 1–5.
- 467 (7) Bracher, A.; Whitney, S. M.; Hartl, F. U.; Hayer-Hartl, M. Biogenesis and metabolic  
468 maintenance of Rubisco. *Annual review of plant biology* **2017**, *68*, 29–60.
- 469 (8) Rae, B. D.; Long, B. M.; Förster, B.; Nguyen, N. D.; Velanis, C. N.; Atkinson, N.;  
470 Hee, W. Y.; Mukherjee, B.; Price, G. D.; McCormick, A. J. Progress and challenges of  
471 engineering a biophysical CO<sub>2</sub>-concentrating mechanism into higher plants. *Journal of*  
472 *Experimental Botany* **2017**, *68*, 3717–3737.

- 473 (9) Badger, M. R.; Price, G. D. CO<sub>2</sub> concentrating mechanisms in cyanobacteria: molecular  
474 components, their diversity and evolution. *Journal of experimental botany* **2003**, *54*,  
475 609–622.
- 476 (10) McGrath, J. M.; Long, S. P. Can the cyanobacterial carbon-concentrating mechanism  
477 increase photosynthesis in crop species? A theoretical analysis. *Plant physiology* **2014**,  
478 *164*, 2247–2261.
- 479 (11) Du, J.; Förster, B.; Rourke, L.; Howitt, S. M.; Price, G. D. Characterisation of  
480 cyanobacterial bicarbonate transporters in *E. coli* shows that SbtA homologs are func-  
481 tional in this heterologous expression system. *PloS one* **2014**, *9*, e115905.
- 482 (12) Rolland, V.; Badger, M. R.; Price, G. D. Redirecting the cyanobacterial bicarbonate  
483 transporters BicA and SbtA to the chloroplast envelope: soluble and membrane cargos  
484 need different chloroplast targeting signals in plants. *Frontiers in plant science* **2016**,  
485 *7*, 185.
- 486 (13) Gupta, J. K.; Rai, P.; Jain, K. K.; Srivastava, S. Overexpression of bicarbonate trans-  
487 porters in the marine cyanobacterium *Synechococcus* sp. PCC 7002 increases growth  
488 rate and glycogen accumulation. *Biotechnology for biofuels* **2020**, *13*, 1–12.
- 489 (14) Chang, Y.-N.; Geertsma, E. R. The novel class of seven transmembrane segment in-  
490 verted repeat carriers. *Biological Chemistry* **2017**, *398*, 165–174.
- 491 (15) Gorbunov, D.; Sturlese, M.; Nies, F.; Kluge, M.; Bellanda, M.; Battistutta, R.;  
492 Oliver, D. Molecular architecture and the structural basis for anion interaction in prestin  
493 and SLC26 transporters. *Nature communications* **2014**, *5*, 3622.
- 494 (16) Walter, J. D.; Sawicka, M.; Dutzler, R. Cryo-EM structures and functional characteri-  
495 zation of murine Slc26a9 reveal mechanism of uncoupled chloride transport. *Elife* **2019**,  
496 *8*, e46986.

- 497 (17) Chang, Y.-N.; Jaumann, E. A.; Reichel, K.; Hartmann, J.; Oliver, D.; Hummer, G.;  
498 Joseph, B.; Geertsma, E. R. Structural basis for functional interactions in dimers of  
499 SLC26 transporters. *Nature Communications* **2019**, *10*, 2032.
- 500 (18) Yu, X.; Yang, G.; Yan, C.; Baylon, J. L.; Jiang, J.; Fan, H.; Lu, G.; Hasegawa, K.;  
501 Okumura, H.; Wang, T.; Tajkhorshid, E.; Li, S.; Yan, N. Dimeric structure of the  
502 uracil:proton symporter UraA provides mechanistic insights into the SLC4/23/26 trans-  
503 porters. *Cell Research* **2017**, *27*, 1020–1033.
- 504 (19) Wang, W.; Tsirolnikov, K.; Zhekova, H. R.; Kayık, G.; Khan, H. M.; Azimov, R.; Ab-  
505 uladze, N.; Kao, L.; Newman, D.; Noskov, S. Y.; Zhou, Z. H.; Pushkin, A.; Kurtz, I.  
506 Cryo-EM structure of the sodium-driven chloride/bicarbonate exchanger NDCBE. *Nature*  
507 *Communications* **2021**, *12*, 5690.
- 508 (20) Coudray, N.; L. Seyler, S.; Lasala, R.; Zhang, Z.; Clark, K. M.; Dumont, M. E.; Ro-  
509 hou, A.; Beckstein, O.; Stokes, D. L. Structure of the SLC4 transporter Bor1p in an  
510 inward-facing conformation. *Protein Science* **2017**, *26*, 130–145.
- 511 (21) Jardetzky, O. Simple allosteric model for membrane pumps. *Nature* **1966**, *211*, 969–970.
- 512 (22) Alper, S. L.; Sharma, A. K. The SLC26 gene family of anion transporters and channels.  
513 *Molecular aspects of medicine* **2013**, *34*, 494–515.
- 514 (23) Long, S. P.; Marshall-Colon, A.; Zhu, X.-G. Meeting the global food demand of the  
515 future by engineering crop photosynthesis and yield potential. *Cell* **2015**, *161*, 56–66.
- 516 (24) Searchinger, T.; Waite, R.; Hanson, C.; Ranganathan, J.; Matthews, E. *Creating a*  
517 *Sustainable Food Future: A Menu of Solutions to Feed Nearly 10 Billion People by*  
518 *2050*; 2019.
- 519 (25) Hollingsworth, S. A.; Dror, R. O. Molecular Dynamics Simulation for All. *Neuron* **2018**,  
520 *99*, 1129–1143.

- 521 (26) Chan, M. C.; Shukla, D. Markov state modeling of membrane transport proteins. *Journal of Structural Biology* **2021**, *213*, 107800.
- 522
- 523 (27) Chen, J.; White, A.; Nelson, D. C.; Shukla, D. Role of substrate recognition in modulating strigolactone receptor selectivity in witchweed. *Journal of Biological Chemistry* **2021**, *297*, 101092.
- 524
- 525
- 526 (28) Shukla, S.; Zhao, C.; Shukla, D. Dewetting Controls Plant Hormone Perception and Initiation of Drought Resistance Signaling. *Structure* **2019**, *27*, 692–702.e3.
- 527
- 528 (29) Moffett, A. S.; Bender, K. W.; Huber, S. C.; Shukla, D. Molecular dynamics simulations reveal the conformational dynamics of Arabidopsis thaliana BRI1 and BAK1 receptor-like kinases. *Journal of Biological Chemistry* **2017**, *292*, 12643–12652.
- 529
- 530
- 531 (30) Zhou, H.; Dong, Z.; Verkhivker, G.; Zoltowski, B. D.; Tao, P. Allosteric mechanism of the circadian protein Vivid resolved through Markov state model and machine learning analysis. *PLOS Computational Biology* **2019**, *15*, e1006801.
- 532
- 533
- 534 (31) Zhao, Y.; Zhang, Y.; Sun, M.; Zheng, Q. A theoretical study on the signal transduction process of bacterial photoreceptor PpSB1 based on the Markov state model. *Physical Chemistry Chemical Physics* **2021**, *23*, 2398–2405.
- 535
- 536
- 537 (32) Trozzi, F.; Wang, F.; Verkhivker, G.; Zoltowski, B. D.; Tao, P. Dimeric allostery mechanism of the plant circadian clock photoreceptor ZEITLUPE. *PLOS Computational Biology* **2021**, *17*, e1009168.
- 538
- 539
- 540 (33) Selvam, B.; Yu, Y.-C.; Chen, L.-Q.; Shukla, D. Molecular Basis of the Glucose Transport Mechanism in Plants. *ACS Central Science* **2019**, *5*, 1085–1096.
- 541
- 542 (34) Cheng, K. J.; Selvam, B.; Chen, L.-Q.; Shukla, D. Distinct Substrate Transport Mechanism Identified in Homologous Sugar Transporters. *The Journal of Physical Chemistry B* **2019**, *123*, 8411–8418.
- 543
- 544

- 545 (35) Weigle, A. T.; Carr, M.; Shukla, D. Impact of Increased Membrane Realism on Confor-  
546 mational Sampling of Proteins. *Journal of Chemical Theory and Computation* **2021**,  
547 *17*, 5342–5357.
- 548 (36) Feng, J.; Selvam, B.; Shukla, D. How do antiporters exchange substrates across the  
549 cell membrane? An atomic-level description of the complete exchange cycle in NarK.  
550 *Structure* **2021**, *29*, 922–933.e3.
- 551 (37) Chan, M. C.; Procko, E.; Shukla, D. Structural Rearrangement of the Serotonin Trans-  
552 porter Intracellular Gate Induced by Thr276 Phosphorylation. *ACS Chemical Neuro-*  
553 *science* **2022**, *13*, 933–945.
- 554 (38) Selvam, B.; Mittal, S.; Shukla, D. Free Energy Landscape of the Complete Transport  
555 Cycle in a Key Bacterial Transporter. *ACS Central Science* **2018**, *4*, 1146–1154.
- 556 (39) Beckstein, O.; Naughton, F. General principles of secondary active transporter function.  
557 *Biophysics Reviews* **2022**, *3*, 011307.
- 558 (40) Drew, D.; Boudker, O. Shared Molecular Mechanisms of Membrane Transporters. *An-*  
559 *ual Review of Biochemistry* **2016**, *85*, 543–572.
- 560 (41) Matsuoka, R.; Fudim, R.; Jung, S.; Zhang, C.; Bazzone, A.; Chatzikyriakidou, Y.;  
561 Robinson, C. V.; Nomura, N.; Iwata, S.; Landreh, M.; Orellana, L.; Beckstein, O.;  
562 Drew, D. Structure, mechanism and lipid-mediated remodeling of the mammalian  
563 Na<sup>+</sup>/H<sup>+</sup> exchanger NHA2. *Nature Structural & Molecular Biology* **2022**, *29*, 108–120.
- 564 (42) Winkelmann, I.; Matsuoka, R.; Meier, P. F.; Shutin, D.; Zhang, C.; Orellana, L.; Sex-  
565 ton, R.; Landreh, M.; Robinson, C. V.; Beckstein, O.; Drew, D. Structure and elevator  
566 mechanism of the mammalian sodium/proton exchanger NHE9. *The EMBO Journal*  
567 **2020**, *39*, 4541–4559.

- 568 (43) Lee, C.; Kang, H. J.; von Ballmoos, C.; Newstead, S.; Uzdavinys, P.; Dotson, D. L.;  
569 Iwata, S.; Beckstein, O.; Cameron, A. D.; Drew, D. A two-domain elevator mechanism  
570 for sodium/proton antiport. *Nature* **2013**, *501*, 573–577.
- 571 (44) Coincon, M.; Uzdavinys, P.; Nji, E.; Dotson, D. L.; Winkelmann, I.; Abdul-Hussein, S.;  
572 Cameron, A. D.; Beckstein, O.; Drew, D. Crystal structures reveal the molecular basis of  
573 ion translocation in sodium/proton antiporters. *Nature Structural & Molecular Biology*  
574 **2016**, *23*, 248–255.
- 575 (45) Dong, Y.; Gao, Y.; Ilie, A.; Kim, D.; Boucher, A.; Li, B.; Zhang, X. C.; Orłowski, J.;  
576 Zhao, Y. Structure and mechanism of the human NHE1-CHP1 complex. *Nature Com-*  
577 *munications* **2021**, *12*, 3474.
- 578 (46) Ruan, Y.; Miyagi, A.; Wang, X.; Chami, M.; Boudker, O.; Scheuring, S. Direct visual-  
579 ization of glutamate transporter elevator mechanism by high-speed AFM. *Proceedings*  
580 *of the National Academy of Sciences* **2017**, *114*, 1584–1588.
- 581 (47) Murata, N.; Wada, H.; Gombos, Z. Modes of Fatty-Acid Desaturation in Cyanobacteria.  
582 *Plant and Cell Physiology* **1992**, *33*, 933–941.
- 583 (48) Wada, H.; Murata, N. *Lipids in photosynthesis: structure, function and genetics*;  
584 Springer, 1998; pp 65–81.
- 585 (49) Case, D. A.; Ben-Shalom, I.; Brozell, S.; Cerutti, D.; Cheatham III, T.; Cruzeiro, V.;  
586 Darden, T.; Duke, R.; Ghoreishi, D.; Gilson, M.; Gohlke, H.; Goetz, A. W.; Greene, D.;  
587 Harris, R.; Homeyer, N.; Huang, Y.; Izadi, S.; Kovalenko, A.; Kurtzman, T.; Lee, T. S.;  
588 LeGrand, S.; Li, P.; Lin, C.; Liu, J.; Luchko, T.; Luo, R.; Mermelstein, D. J.;  
589 Merz, K. M.; Miao, Y.; Monard, G.; Nguyen, C.; Nguyen, H.; Omelyan, I.; Onufriev, A.;  
590 Pan, F.; Qi, R.; Roe, D. R.; Roitberg, A.; Sagui, C.; Schott-Verdugo, S.; Shen, J.; Sim-  
591 merling, C. L.; Smith, J.; SalomonFerrer, R.; Swails, J.; Walker, R. C.; Wang, J.;

- 592 Wei, H.; Wolf, R. M.; Wu, X.; Xiao, L.; York, D. M.; Kollman, P. A. AMBER 2018.  
593 *University of California, San Francisco* **2018**,
- 594 (50) Klauda, J. B.; Venable, R. M.; Freites, J. A.; OConnor, J. W.; Tobias, D. J.;  
595 Mondragon-Ramirez, C.; Vorobyov, I.; MacKerell, A. D.; Pastor, R. W. Update of the  
596 CHARMM All-Atom Additive Force Field for Lipids: Validation on Six Lipid Types.  
597 *The Journal of Physical Chemistry B* **2010**, *114*, 7830–7843.
- 598 (51) van Eerden, F. J.; de Jong, D. H.; de Vries, A. H.; Wassenaar, T. A.; Marrink, S. J.  
599 Characterization of thylakoid lipid membranes from cyanobacteria and higher plants by  
600 molecular dynamics simulations. *Biochimica et Biophysica Acta (BBA) - Biomembranes*  
601 **2015**, *1848*, 1319–1330.
- 602 (52) Jumper, J.; Evans, R.; Pritzel, A.; Green, T.; Figurnov, M.; Ronneberger, O.; Tun-  
603 yasuvunakool, K.; Bates, R.; Žídek, A.; Potapenko, A.; Bridgland, A.; Meyer, C.;  
604 Kohl, S. A. A.; Ballard, A. J.; Cowie, A.; Romera-Paredes, B.; Nikolov, S.; Jain, R.;  
605 Adler, J.; Back, T.; Petersen, S.; Reiman, D.; Clancy, E.; Zielinski, M.; Steinegger, M.;  
606 Pacholska, M.; Berghammer, T.; Bodenstein, S.; Silver, D.; Vinyals, O.; Senior, A. W.;  
607 Kavukcuoglu, K.; Kohli, P.; Hassabis, D. Highly accurate protein structure prediction  
608 with AlphaFold. *Nature* **2021**, *596*, 583–589.
- 609 (53) Shibagaki, N.; Grossman, A. R. Binding of Cysteine Synthase to the STAS Domain of  
610 Sulfate Transporter and Its Regulatory Consequences. *Journal of Biological Chemistry*  
611 **2010**, *285*, 25094–25102.
- 612 (54) Ko, S. B.; Zeng, W.; Dorwart, M. R.; Luo, X.; Kim, K. H.; Millen, L.; Goto, H.;  
613 Naruse, S.; Soyombo, A.; Thomas, P. J.; Muallem, S. Gating of CFTR by the STAS  
614 domain of SLC26 transporters. *Nature Cell Biology* **2004**, *6*, 343–350.
- 615 (55) Jiang, T.; Wen, P.-C.; Trebesch, N.; Zhao, Z.; Pant, S.; Kapoor, K.; Shekhar, M.;

- 616 Tajkhorshid, E. Computational Dissection of Membrane Transport at a Microscopic  
617 Level. *Trends in Biochemical Sciences* **2020**, *45*, 202–216.
- 618 (56) Dror, R. O.; Dirks, R. M.; Grossman, J.; Xu, H.; Shaw, D. E. Biomolecular Simula-  
619 tion: A Computational Microscope for Molecular Biology. *Annual Review of Biophysics*  
620 **2012**, *41*, 429–452.
- 621 (57) Husic, B. E.; Pande, V. S. Markov state models: From an art to a science. *Journal of*  
622 *the American Chemical Society* **2018**, *140*, 2386–2396.
- 623 (58) Phillips, J. C.; Hardy, D. J.; Maia, J. D. C.; Stone, J. E.; Ribeiro, J. V.; Bernardi, R. C.;  
624 Buch, R.; Fiorin, G.; Hénin, J.; Jiang, W.; McGreevy, R.; Melo, M. C. R.; Radak, B. K.;  
625 Skeel, R. D.; Singharoy, A.; Wang, Y.; Roux, B.; Aksimentiev, A.; Luthey-Schulten, Z.;  
626 Kalé, L. V.; Schulten, K.; Chipot, C.; Tajkhorshid, E. Scalable molecular dynamics  
627 on CPU and GPU architectures with NAMD. *The Journal of Chemical Physics* **2020**,  
628 *153*, 044130.
- 629 (59) Crooks, G. E.; Hon, G.; Chandonia, J.-M.; Brenner, S. E. WebLogo: a sequence logo  
630 generator. *Genome research* **2004**, *14*, 1188–1190.
- 631 (60) Jiang, T.; Wen, P.-C.; Trebesch, N.; Zhao, Z.; Pant, S.; Kapoor, K.; Shekhar, M.;  
632 Tajkhorshid, E. Computational dissection of membrane transport at a microscopic level.  
633 *Trends in biochemical sciences* **2020**, *45*, 202–216.
- 634 (61) Babu, M.; Greenblatt, J. F.; Emili, A.; Strynadka, N. C.; Reithmeier, R. A.;  
635 Moraes, T. F. Structure of a SLC26 anion transporter STAS domain in complex with  
636 acyl carrier protein: implications for *E. coli* YchM in fatty acid metabolism. *Structure*  
637 **2010**, *18*, 1450–1462.
- 638 (62) Okazaki, K.-i.; Wöhlert, D.; Warnau, J.; Jung, H.; Yildiz, Ö.; Kühlbrandt, W.; Hum-  
639 mer, G. Mechanism of the electroneutral sodium/proton antiporter PaNhaP from  
640 transition-path shooting. *Nature communications* **2019**, *10*, 1742.



- 641 (63) Martínez, L.; Andrade, R.; Birgin, E. G.; Martínez, J. M. PACKMOL: A package for  
642 building initial configurations for molecular dynamics simulations. *Journal of Compu-*  
643 *tational Chemistry* **2009**, *30*, 2157–2164.
- 644 (64) Webb, B.; Sali, A. Comparative Protein Structure Modeling Using MODELLER. *Cur-*  
645 *rent Protocols in Bioinformatics* **2016**, *54*, 5.6.1–5.6.37.
- 646 (65) Evans, R.; O’Neill, M.; Pritzel, A.; Antropova, N.; Senior, A.; Green, T.; Žídek, A.;  
647 Bates, R.; Blackwell, S.; Yim, J.; Ronneberger, O.; Bodenstein, S.; Zielinski, M.;  
648 Bridgland, A.; Potapenko, A.; Cowie, A.; Tunyasuvunakool, K.; Jain, R.; Clancy, E.;  
649 Kohli, P.; Jumper, J.; Hassabis, D. Protein complex prediction with AlphaFold-  
650 Multimer. *bioRxiv* **2021**, doi:10.1101/2021.10.04.463034.
- 651 (66) Hopkins, C. W.; Le Grand, S.; Walker, R. C.; Roitberg, A. E. Long-time-step molec-  
652 ular dynamics through hydrogen mass repartitioning. *Journal of chemical theory and*  
653 *computation* **2015**, *11*, 1864–1874.
- 654 (67) Huynh, K. W.; Jiang, J.; Abuladze, N.; Tsirulnikov, K.; Kao, L.; Shao, X.; Newman, D.;  
655 Azimov, R.; Pushkin, A.; Zhou, Z. H.; Kurtz, I. CryoEM structure of the human  
656 SLC4A4 sodium-coupled acid-base transporter NBCe1. *Nature Communications* **2018**,  
657 *9*, 900.
- 658 (68) Roe, D. R.; Cheatham, T. E. PTRAJ and CPPTRAJ: Software for Processing and  
659 Analysis of Molecular Dynamics Trajectory Data. *J. Chem. Theory Comput.* **2013**, *9*,  
660 3084–3095.
- 661 (69) McGibbon, R.; Beauchamp, K.; Harrigan, M.; Klein, C.; Swails, J.; Hernandez, C.;  
662 Schwantes, C.; Wang, L.-P.; Lane, T.; Pande, V. MDTraj: A Modern Open Library for  
663 the Analysis of Molecular Dynamics Trajectories. *Biophys. J* **2015**, *109*, 1528–1532.
- 664 (70) Humphrey, W.; Dalke, A.; Schulten, K. VMD: visual molecular dynamics. *Journal of*  
665 *molecular graphics* **1996**, *14*, 33–38.

- 666 (71) Zhou, Q.; Yang, D.; Wu, M.; Guo, Y.; Guo, W.; Zhong, L.; Cai, X.; Dai, A.; Jang, W.;  
667 Shakhnovich, E. I.; Liu, Z.-J.; Stevens, R. C.; Lambert, N. A.; Babu, M. M.; Wang, M.-  
668 W.; Zhao, S. Common activation mechanism of class A GPCRs. *eLife* **2019**, *8*, e50279.
- 669 (72) Shirts, M. R.; Chodera, J. D. Statistically optimal analysis of samples from multiple  
670 equilibrium states. *The Journal of chemical physics* **2008**, *129*, 124105.
- 671 (73) Ashkenazy, H.; Abadi, S.; Martz, E.; Chay, O.; Mayrose, I.; Pupko, T.; Ben-Tal, N.  
672 ConSurf 2016: an improved methodology to estimate and visualize evolutionary con-  
673 servation in macromolecules. *Nucleic acids research* **2016**, *44*, W344–W350.
